# Supplementary material for: Mechanism and Role of SOX2 Repression in Seminoma: Relevance to Human Germline Specification
Source: PubMed Central journal article supplement — Stem Cell Reports. 2016 Apr 28;6(5):772–83. doi: 10.1016/j.stemcr.2016.04.002 (PMC4939754; doi:10.1016/j.stemcr.2016.04.002), 2016-04-28

# Mechanism and Role of SOX2 Repression in Seminoma: Relevance to Human Germline Specification

Ritu Kushwaha,<sup>1</sup> Nirmala Jagadish,<sup>1,8</sup> Manjunath Kustagi,<sup>2,6</sup> Geetu Mendiratta,<sup>1,7</sup> Marco Seandel,<sup>3</sup> Rekha Soni,<sup>1</sup> James E. Korkola,<sup>1,9</sup> Venkata Thodima,<sup>4</sup> Andrea Califano,<sup>2</sup> George J. Bosl,<sup>5</sup> and R.S.K. Chaganti<sup>1,5,\*</sup>

<sup>1</sup>Cell Biology Program, Memorial Sloan-Kettering Cancer Center, New York, NY 10065, USA

<sup>2</sup>Department of Systems Biology, Columbia University, New York, NY 10032, USA

<sup>3</sup>Department of Surgery, Weill Cornell Medical Center, New York, NY 10065, USA

<sup>4</sup>Cancer Genetics, Inc., Rutherford, NJ 07070, USA

<sup>5</sup>Department of Medicine, Memorial Sloan-Kettering Cancer Center, New York, NY 10065, USA

<sup>6</sup>Present address: Rockefeller University, New York, NY 10065, USA

<sup>7</sup>Present address: Ichan School of Medicine at Mount Sinai, New York, NY 10029, USA

<sup>8</sup>Present address: National Institute of Immunology, New Delhi 110067, India

<sup>9</sup>Present address: Oregon Health & Science University, Portland, OR 97239, USA

\*Correspondence: [chagantr@mskcc.org](mailto:chagantr@mskcc.org)

<http://dx.doi.org/10.1016/j.stemcr.2016.04.002>

## SUMMARY

Human male germ cell tumors (GCTs) are derived from primordial germ cells (PGCs). The master pluripotency regulator and neuroectodermal lineage effector transcription factor *SOX2* is repressed in PGCs and the seminoma (SEM) subset of GCTs. The mechanism of *SOX2* repression and its significance to GC and GCT development currently are not understood. Here, we show that *SOX2* repression in SEM-derived TCam-2 cells is mediated by the Polycomb repressive complex (PcG) and the repressive H3K27me3 chromatin mark that are enriched at its promoter. Furthermore, *SOX2* repression in TCam-2 cells can be abrogated by recruitment of the constitutively expressed H3K27 demethylase *UTX* to the *SOX2* promoter through retinoid signaling, leading to expression of neuronal and other lineage genes. *SOX17* has been shown to initiate human PGC specification, with its target *PRDM1* suppressing mesendodermal genes. Our results are consistent with a role for *SOX2* repression in normal germline development by suppressing neuroectodermal genes.

## INTRODUCTION

Human male germ cell tumors (GCTs) are thought to originate in primordial germ cells (PGCs) most likely by a mechanism similar to that recently described for the origin of teratocarcinomas in strain 128 family mice (Heaney et al., 2012). The key driver for this process is suggested to be upregulation of genes in the pathways controlling pluripotency and proliferation, such as *NANOG*, *CCND2*, and *RASK2* that map to chromosome 12p (Chaganti and Houldsworth, 2000; Korkola et al., 2006). GCTs comprise two main subsets, seminoma (SEM) and nonseminoma (NS), with a common precursor, germ cell neoplasia in situ (GCNIS). SEM is unipotent whereas the NS subset embryonal carcinoma (EC) is pluripotent, analogous to the blastocyst (Andrews et al., 2005), and has a gene-expression profile (GEP) similar to that of embryonic stem cells (ESCs) (Sperger et al., 2003; Josephson et al., 2007). EC differentiates to extraembryonic (choriocarcinoma, yolk sac tumor) and embryonic (teratoma) lineages (Chaganti and Houldsworth, 2000). Comparison of GEPs of human PGC (hPCG)-like cells derived in vitro from ESCs, gonadal GCs, and the SEM cell line TCam-2 suggested that SEM arises in PGCs and hence is a good model system to investigate hPCG biology (Irie et al., 2015). *SOX17* was shown to be the key specifier of hPCG fate,

with the downstream *PRDM1* repressing mesendodermal genes (Irie et al., 2015).

The core pluripotency regulatory master transcription factors (TFs) *POU5F1* and *NANOG* are expressed in both EC and SEM, whereas *SOX2* is repressed in hPCGs (Perrett et al., 2008; Irie et al., 2015), GCNIS, and SEM (Korkola et al., 2006). The molecular mechanism of *SOX2* repression in the hPCG-GCNIS-SEM lineage has so far not been characterized. We show here that *SOX2* repression in TCam-2 cells is due to the co-occupation by the Polycomb group (PcG) proteins and the repressive chromatin mark H3K27me3 near its transcription start site (TSS). We further show that the occupancy of H3K27me3 decreases when *UTX*, a H3K27-specific demethylase, is recruited to the *SOX2* promoter in response to retinoid signaling, leading to *SOX2* transcriptional derepression and induction of neuronal genes, consistent with its function as a neuroectodermal effector (Thomson et al., 2011; Zhang and Cui, 2014). Thus, *SOX2* repression in TCam-2/SEM is imposed by PcG and its derepression is regulated by *UTX*. These data are consistent with a model of hPCG development initiated by *SOX17*, with *PRDM1* repressing mesodermal genes and *SOX2* repression inhibiting neuroectodermal genes.

Although murine and human PGCs re-express pluripotency genes following specification, pluripotency remains

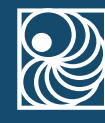

latent and becomes functional only when PGCs are cultured in vitro as embryonic germ cells or transform in vivo as GCTs (Leitch et al., 2013). By analysis of GEPs of SEM and EC, we show here that the functional pathways of SEM reflect their derivation from PGCs, while those of EC, also derived from PGCs, reflect re-establishment of pluripotency in the transformed PGCs. These data are of value in understanding the biology of hPGCs and regulation of the pluripotency state in the unique GCT system.

## RESULTS

### Functional Programs in SEM and EC Reflect Their Development from PGCs following Malignant Transformation and Re-establishment of Pluripotency

Despite their common origin from transformed hPGCs, SEM retains the germline characteristic of latent pluripotency while EC attains embryonal-like pluripotency. As such, SEM and EC provide an opportunity to identify the functional pathways that underlie the latent and patent pluripotency of the two PGC-derived tumor states. Toward this end, we performed significance analysis for microarray (SAM) and gene ontology (GO biological process) analyses of the upregulated and downregulated genes in the GEPs of 41 EC and 16 SEM tumors in comparison with those of five normal testis controls. These GEPs were a subset of the GEP data of a larger cohort of GCTs representing all histologic and developmental categories and normal testis biopsies that we previously published (Korkola et al., 2005, 2006, 2009). SAM analysis showed that upregulated genes in SEM included the GC genes *KIT*, *CD38*, *TNAP*, *SOX17*, *NANOS*, *TFAP2C*, and *UTF1* consistent with their PGC derivation as previously shown in the TCam-2 SEM cell line (Irie et al., 2015) (Tables S1 and S2). GO analysis identified significantly upregulated categories in SEM related to DNA integrity ( $p = 4.5 \times 10^{-4}$ ) and damage response ( $4.5 \times 10^{-5}$ ), regulation of cell morphogenesis ( $p = 4.86 \times 10^{-4}$ ), and RNA processing ( $3.7 \times 10^{-10}$ ), whereas those in EC related to stem cell maintenance ( $p = 0.003$ ), cell morphogenesis ( $p = 4.2 \times 10^{-7}$ ), multicellular organismal process ( $p = 0.0002$ ), anatomic structure morphogenesis ( $p = 8.38 \times 10^{-7}$ ), and response to wounding ( $p = 8.59 \times 10^{-10}$ ) (Figure 1). In addition, upregulated categories representing cell proliferation ( $pSEM = 1.13 \times 10^{-3}$ ;  $pEC = 0.0038$ ) and negative regulation of apoptosis ( $pSEM = 3.34 \times 10^{-4}$ ;  $pEC = 4.05 \times 10^{-5}$ ) were common to both subsets, reflecting their transformed state (Figure 1). The downregulated categories were remarkably similar in both subsets and were represented by gamete generation ( $pSEM = 6.24 \times 10^{-44}$ ;  $pEC = 2.28 \times 10^{-45}$ ), spermatogenesis ( $pSEM = 7.24 \times 10^{-52}$ ;  $pEC = 3.43 \times 10^{-57}$ ), spermatid

differentiation ( $pSEM = 2.68 \times 10^{-12}$ ;  $pEC = 2.8 \times 10^{-13}$ ), meiotic cycle ( $pSEM = 3.24 \times 10^{-12}$ ;  $pEC = 3.16 \times 10^{-12}$ ), and reproduction ( $pSEM = 7.58 \times 10^{-31}$ ;  $pEC = 1.06 \times 10^{-30}$ ) (Figure 1). These data represent elucidation of regulatory pathways in these two subsets.

### Computationally Identified SOX2 Targets Involved in Pluripotency and Differentiation Pathways Are Significantly Enriched in EC Compared with SEM

We recently assembled a complete in vivo GCT TF interactome (GCT<sup>Net</sup>) based on the GEPs of tumor biopsies using the Algorithm for the Reconstruction of Accurate Cellular Networks (ARACNe) (Kushwaha et al., 2015). GCT<sup>Net</sup>, comprising 1,305 TFs and ~250,000 interactions, which encompassed all the functional pathways operating in this tumor system and inferred all the expressed target genes of the entire complement of TFs. This analysis showed that *POU5F1*, *NANOG*, and *SOX2* had 338, 376, and 307 ARACNe-inferred individual target genes, respectively. In addition, *POU5F1* and *NANOG* shared 127 common targets, whereas *POU5F1* and *SOX2*, and *NANOG* and *SOX2*, shared 40 common targets. We validated the ARACNe-inferred targets of these three genes by analysis of GEP following their short hairpin RNA-mediated knock-down (KD) and by genome sequencing following chromatin immunoprecipitation (ChIP) in EC-derived NT2/D1 cells, thus establishing their role as mechanistic transcriptional targets (Kushwaha et al., 2015). We now performed GEP analysis of NT2/D1 and TCam-2 cells and assessed the enrichment of the previously identified ARACNe-inferred targets of *POU5F1*, *NANOG*, and *SOX2* in genes that are differentially expressed between the two cell lines by gene set enrichment analysis (GSEA) (Mootha et al., 2003; Subramanian et al., 2005). As shown in Figure 2A, this analysis clearly shows that whereas target enrichment was significant for all three TFs between NT2/D1 and TCam-2 cell lines, *SOX2* targets showed enrichment in overexpressed genes in NT2/D1 compared with TCam-2, while *NANOG* and *POU5F1* showed opposite enrichment, i.e., in underexpressed genes. Whereas a GO analysis of GSEA targets of *SOX2* overexpressed in TCam-2 cells identified no significant categories, that of NT2/D1 cells showed stem cell development ( $p = 5.11 \times 10^{-4}$ ), cellular developmental process ( $p = 4.61 \times 10^{-4}$ ), nervous system development ( $p = 1.67 \times 10^{-4}$ ), multicellular organismal development ( $p = 6.99 \times 10^{-5}$ ), system development ( $p = 1.94 \times 10^{-5}$ ), anatomical structure development ( $p = 1.7 \times 10^{-5}$ ), developmental process ( $p = 9.93 \times 10^{-6}$ ), and stem cell differentiation ( $p = 2.09 \times 10^{-6}$ ) among the highly enriched categories. GSEA analysis of the three TFs from the 41 EC and 16 SEM showed consistent results (Figure 2B). Indeed, our previous analysis of *POU5F1*, *NANOG*, and *SOX2* targets in GCT<sup>Net</sup> showed

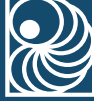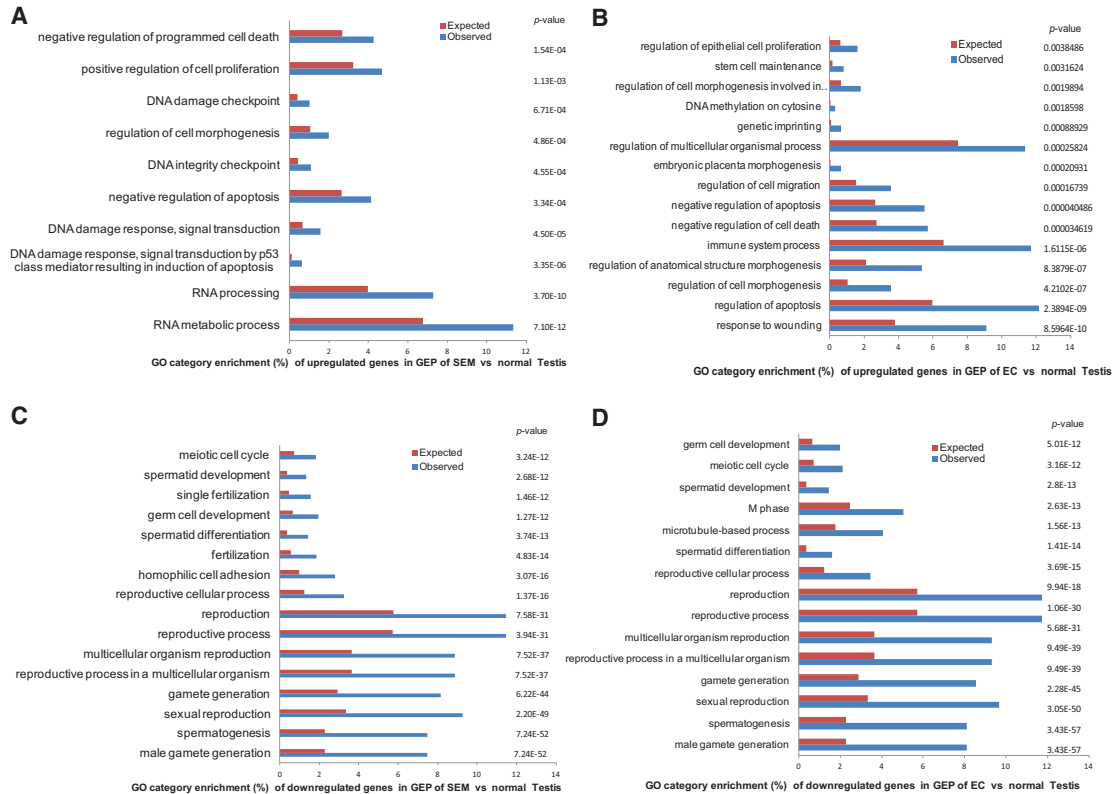

**Figure 1. Top GO Categories Enriched in GEPs of SEM and EC in Comparison with Normal Testis**

The graphs were prepared using the Cytoscape plugin (BiNGO).

(A and B) Upregulated categories in SEM (A) and EC (B) compared with normal testis.

(C and D) Downregulated categories in SEM (C) and EC (D) compared with normal testis.

that whereas *NANOG* and *POU5F1* had largely overlapping programs related to cellular organization and DNA and cellular metabolism categories, *SOX2* controlled a relatively independent program enriched for categories representing regulation of histone methylation and modification, stem cell differentiation, and a variety of differentiation-associated programs including those associated with neuronal, axonal, and chondrocyte differentiation (Kushwaha et al., 2015). Taken together, these results establish that functional pathways related to stem cell and neuronal development regulated by *SOX2* are curtailed in SEM but restored in EC following re-establishment of pluripotency.

### *PRDM1* Does Not Regulate *SOX2* in TCam-2 and NT2/D1 Cells

A recent study showed that ectopic upregulation of *PRDM1* in the H9 hES cells and the PA-1, NTERA-2, and NCCIT EC cells led to downregulation of *SOX2* expression, suggesting direct *PRDM1* regulation of *SOX2* (Lin et al., 2014). We investigated the potential role of *PRDM1* in regulating *SOX2* expression in TCam-2 and NT2/D1 cells, the latter

as *SOX2*-expressing control, by KD of the gene in these two cell lines using the relevant SMARTpool small interfering RNAs (siRNAs) and measuring *SOX2* mRNA expression by qRT-PCR at 72 hr following KD. *SOX2* expression was neither upregulated in TCam-2 cells nor downregulated in NT2/D1 cells. We further assayed for *PRDM1* and *SOX2* expression by immunofluorescence (IF) in NT2/D1 and *PRDM1*-KD TCam-2 cells, which confirmed the mRNA analysis (Figure 3). These results show that *PRDM1* does not directly regulate *SOX2* and that some other mechanism may be involved in keeping the gene repressed in hPGCs and SEM.

### *SOX2* Promoter in TCam-2 Cells Is a Target of PcG

We first investigated promoter methylation as a possible mechanism for *SOX2* repression in SEM. We compared the methylation status of *SOX2* promoter in bisulfite-converted DNA from five each of SEM and EC tumors along with eight EC cell lines (NT2/D1, 27X-1, NCCIT, 169A, 218A, 228A, 2101ep, TERA-1) and the TCam-2 SEM cell line, quantitating the degree of methylation by mass spectrometry of amplification products of eight primer

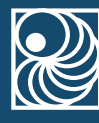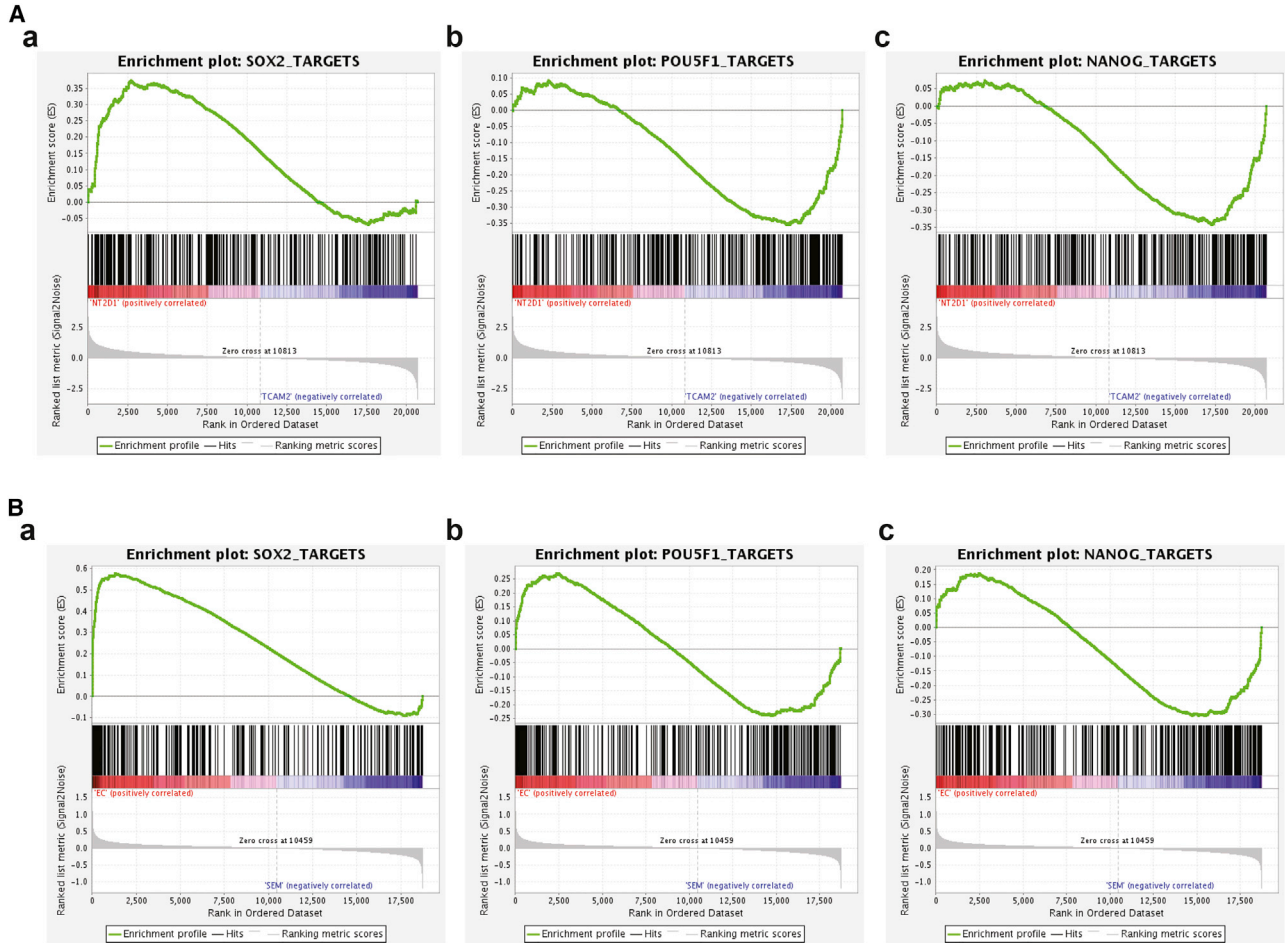

**Figure 2. ARACNe-Predicted *SOX2* Targets Are Enriched in NT2D/1 Cells and EC Compared with TCam-2 Cells and SEM**

(A) GSEA enrichment analysis of targets of (a) *SOX2* ( $p = 0.05$ ), (b) *POU5F1* ( $p = 0.04$ ), and (c) *NANOG* ( $p = 0.0$ ) in TCam-2 versus NT2/D1 cells.

(B) GSEA enrichment analysis of targets in EC versus SEM of (a) *SOX2* (0.027), (b) *POU5F1* (0.5), and (c) *NANOG* (0.4). All  $p$  values are by two-tailed  $t$  test.

sets that covered the entire CpG island of the *SOX2* promoter (1,000 kbp upstream and 1,000 kbp downstream of the TSS), using the Sequenom EpiTYPER assay. No methylation was detected affecting the *SOX2* promoter of SEM or EC tumors, or their derived cell lines (Figures S1A and S1B), ruling out promoter methylation as the basis for *SOX2* repression in SEM.

We then investigated the possibility of epigenetic modification as the mechanism of *SOX2* repression. In genome-wide mapping studies using human embryonic fibroblast cells, the *SOX2* promoter has previously been recognized as a target of PcG, being enriched for SUZ12 (Polycomb repressive complex 2 [PRC2]), CBX8 (Polycomb repressive complex 1 [PRC1]), and H3K27me3 (Bracken et al., 2006). To investigate whether *SOX2* promoter is a target for PcG in human germline cells, we

assayed for the co-occupancy of SUZ12, BMI1 (PRC1), and H3K27me3 at the *SOX2* promoter in TCam-2 cells by ChIP-qPCR. All three components of PcG were enriched at the *SOX2* promoter, confirming epigenetic modification as the basis for its transcriptional repression in TCam-2 cells (Figure 4).

### ***SOX2* Transcription in TCam-2 Cells Is Regulated by *UTX* during Retinoid Signaling**

*UTX*, a member of the JumonjiC family TFs, is a di- and trimethyl H3K27 demethylase that also associates with mixed-lineage leukemia 2/3 (MLL) complexes possessing H3K4 methyltransferase activity; it occupies the promoters of *HOX* gene clusters and modulates their transcriptional output by regulating PRC1 and monoubiquitination of H2A in HEK 293 cells (Lee et al., 2007). During

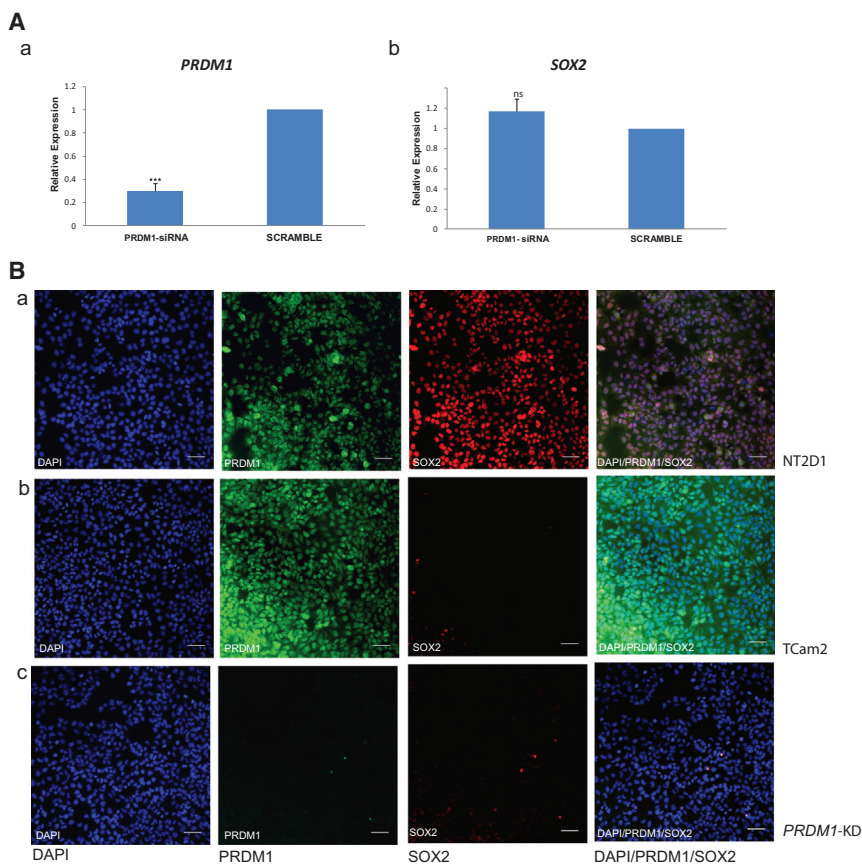

### Figure 3. *SOX2* Expression Is Not Altered in *PRDM1*-KD Tcam-2 Cells

(A) qRT-PCR analysis of (a) *PRDM1* and (b) *SOX2* expression in *PRDM1*-KD cells following normalization to *PGK1* signal. Data represent mean  $\pm$  SD of three independent experiments. \*\*\* $p > 0.001$  by Student's *t* test; ns, not significant.

(B) Representative IF images of (a) NT2D-1, (b) Tcam-2, and (c) *PRDM1*-KD Tcam-2 cells stained for DAPI (blue), *PRDM1* (green), and *SOX2* (red), and merged images. Scale bars represent 100  $\mu$ m.

retinoid-induced signaling in NT2/D1 cells, recruitment of *UTX* to *HOX* genes results in H3K27 demethylation and H3K4 methylation, leading to *HOXA13* and *HOXC4* gene transcription (Lee et al., 2007). *UTX* is endogenously expressed in Tcam-2 cells and we reasoned that it may regulate *SOX2* in these cells as well, when challenged to differentiate. Since retinoid signaling is known to be a major regulator of differentiation in stem cells (Gudas and Wagner, 2011), we induced differentiation in Tcam-2 cells by treatment with all-*trans* retinoic acid (RA). Western blot and IF analysis of RA-treated cells showed *SOX2* expression increasing and *POU5F1* and *NANOG* expression decreasing from day 2 to day 6 following RA treatment (Figures 5A and 5C). *UTX* expression remained constant in treated as well as untreated cells (Figure 5B). However, ChIP-qPCR analysis showed significant enrichment of *UTX* at *SOX2* promoter in day-6 RA-treated cells compared with control cells (Figure 5D).

To investigate the role of *UTX* in *SOX2* repression/derepression, we performed *UTX* KD in Tcam-2 cells using SMARTpool siRNA and treated the cells with RA for 6 days, and assayed for expression of *UTX* and *SOX2*. *SOX2* failed to be upregulated in response to RA in *UTX*-depleted cells, indicating *UTX* requirement for *SOX2* dere-

pression (Figures 6A and 6B). We then investigated the mechanism of *UTX*-regulated *SOX2* derepression by assaying the changes in the enrichment of the histone marks H3K27me3 and H3K4me3 at the *SOX2* promoter by ChIP-qPCR in control (scramble) and *UTX*-KD cells following 6 days of RA treatment. As expected, the H3K27me3 mark was enriched in control cells and was reduced upon RA treatment (Figure 6C). In the *UTX*-KD cells, however, the H3K27me3 mark enrichment remained unchanged between treated and untreated cells, confirming *UTX* dependence of the repressive mark change in response to RA at the *SOX2* promoter (Figure 6C). RA treatment elicited a highly significant enrichment of the H3K4me3 mark at the *SOX2* promoter in control cells (Figure 6D). In the *UTX*-KD cells the enrichment was significant, but less than that in the control cells (Figure 6D). Although *UTX* is known to associate with MLL complexes that possess H3K4 methyltransferase activity, it is not known to directly regulate H3K4me3. Thus, these results overall demonstrate that recruitment of *UTX* to *SOX2* promoter in Tcam-2 cells is associated with a decrease in occupancy of the repressive H3K27me3 and an increase in occupancy of the activating H3K4me3 mark, thereby enabling *SOX2* derepression in response to RA signal.

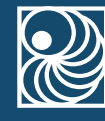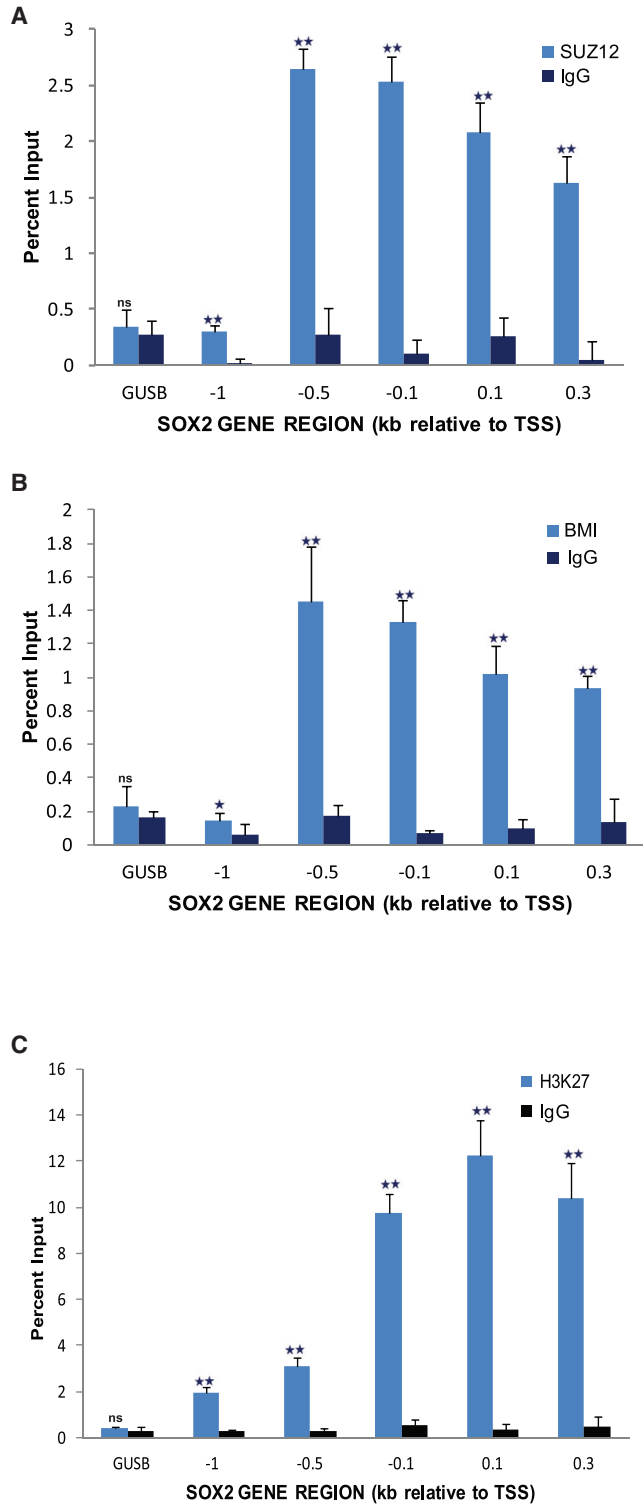

**Figure 4. PcG Proteins SUZ12 and BMI1 and the Repressive Chromatin Mark H3K27me3 Are Enriched at *SOX2* Promoter in Tcam-2 Cells**

ChIP analyses were performed using antibodies for (A) SUZ12, (B) BMI1, (C) H2K27me3, or immunoglobulin G (IgG) (as nonspecific

#### Derepression of *SOX2* Leads to Induction of Neuronal and Other Lineage Genes in Tcam-2 Cells

We obtained the GEP of day-14 RA-treated Tcam-2 cells, which by now were completely differentiated morphologically, using Affymetrix U133 A plus B arrays, and analyzed the expression of marker genes related to lineage development (Figure S2). The major lineage expressed was neuronal, with genes such as *NEFM*, *PAX6*, *NEFL*, *NESTIN*, *TUJI*, and *TRKC* showing significantly higher expression than in untreated cells. Epithelial and mesodermal genes such as *CDH1*, *EPCAM*, *FOXN1*, and *T* were downregulated in the RA-treated cells, although *KRT* was upregulated. Interestingly, several endodermal genes (*DAB2*, *NODAL*, *SPARC*) were upregulated while others (*SOX17*, *EPAS1*, *GATA4*) were downregulated. In addition, smooth muscle lineage genes such as *MEF2C* and *MYH6* were also expressed in the differentiated cells. We confirmed the GEP results on neuronal gene expression by IF analysis using *NEFM*, *NESTIN*, *TUJI*, and *TRKC* antibodies (Figure 7A). We further evaluated by qRT-PCR the status of the neuronal markers *NEUROD4*, *NEFM*, *NES*, *TRKC*, and *TUJI* in control (scramble) and UTX-KD Tcam-2 cells treated with RA to test the effect of UTX depletion that prevented *SOX2* upregulation. The expression of each of these genes was significantly lower in the UTX-KD cells compared with control cells in response to RA treatment, confirming the role of *SOX2* in regulating neuronal gene expression (Figure 7B).

We also performed GO analysis of the expressed *SOX2* targets predicted by ARACNe in the GEP of the day-14 RA-treated Tcam-2 cells. As shown in Figure 7C, the upregulated target genes represented a variety of developmental processes, with nervous system categories predominating: axonogenesis ( $p = 1.20 \times 10^{-3}$ ), tube development ( $p = 1.07 \times 10^{-3}$ ), gliogenesis ( $p = 8.03 \times 10^{-4}$ ), nervous system development ( $p = 6.59 \times 10^{-4}$ ), neuron projection regeneration ( $p = 6.13 \times 10^{-4}$ ), axon cargo transport ( $p = 5.26 \times 10^{-4}$ ), axon regeneration ( $p = 4.46 \times 10^{-4}$ ), system development ( $p = 2.24 \times 10^{-4}$ ), stem cell differentiation ( $p = 1.07 \times 10^{-4}$ ), anterograde axon cargo transport ( $p = 6.84 \times 10^{-5}$ ), multicellular organism development ( $p = 5.85 \times 10^{-5}$ ), anatomical structural morphogenesis ( $p = 4.6 \times 10^{-5}$ ), developmental process ( $p = 2.76 \times 10^{-6}$ ), and anatomical structure development ( $p = 2.34 \times 10^{-6}$ ). These results together confirm direct *SOX2* regulation of neuroectodermal genes.

Taken together, the data presented above are consistent with the hypothesis that *SOX2* transcription, which is repressed in Tcam-2 as well as in its progenitor hPGC cells,

control) in Tcam-2 cells. Plotted values are relative enrichment to 10% input and measured for indicated site in the *SOX2* promoter and *GUSB* ( $\beta$ -glucuronidase) gene (control). Data represent mean  $\pm$  SD of three independent experiments. Student's t test: ns, not significant; \*\* $p < 0.01$ ; \* $p < 0.05$ .

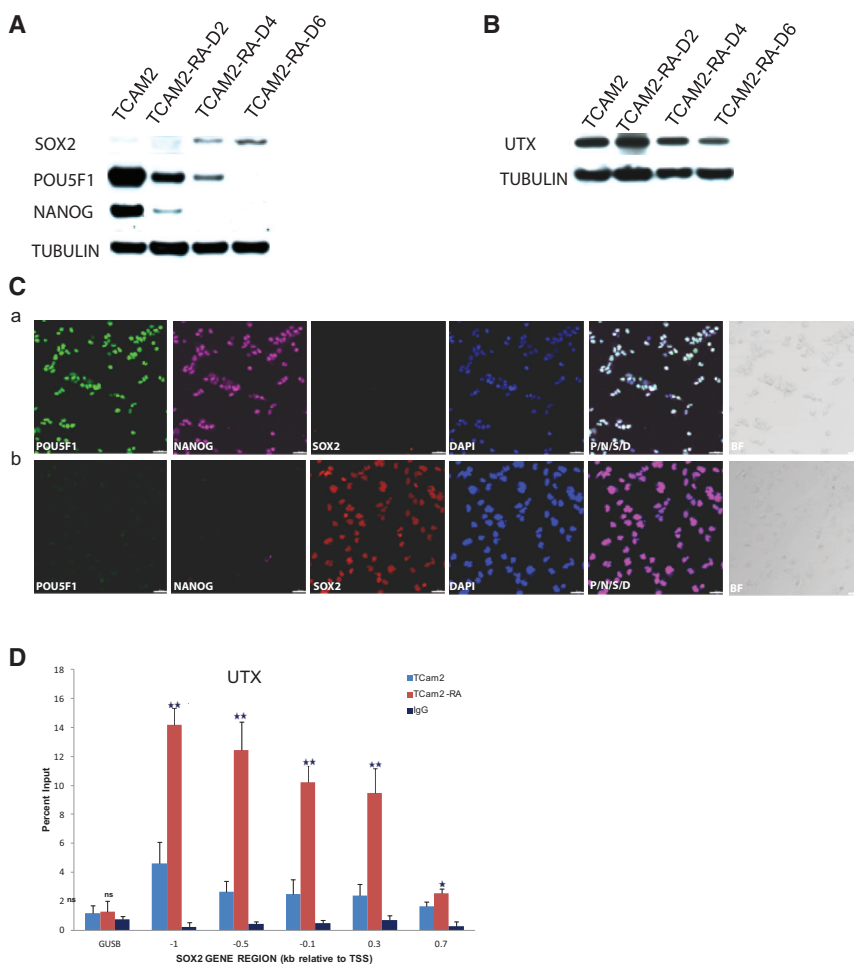

### Figure 5. SOX2 Is Expressed in TCam-2 Cells following RA Treatment

(A) Immunoblot of RA-treated and untreated cells showing increased SOX2 (35 kDa) expression and decreased POU5F1 (39 kDa) and NANOG (34 kDa) expression over a 6-day time course. Tubulin (50 kDa) is loading control.

(B) Immunoblot showing unchanged UTX (150 kDa) expression over a 6-day time course. Tubulin (50 kDa) is loading control.

(C) IF showing SOX2, POU5F1, and NANOG expression following RA treatment. (a) Untreated TCam-2 cells showing POU5F1 (green), NANOG (magenta), and DAPI (blue), but not SOX2 (red) expression. (b) RA-treated TCam-2 cells showing SOX2 but not POU5F1 and NANOG expression. BF is brightfield image. Scale bars represent 100  $\mu$ m.

(D) RA-treated and untreated TCam-2 cells were subjected to ChIP-qPCR using UTX antibody or an IgG antibody (nonspecific control). The immunoprecipitated DNA was subjected to PCR using primers specific to the SOX2 promoter region. Data represent mean  $\pm$  SD of three independent experiments. Student's t test: ns, not significant; \*\*p < 0.01; \*p < 0.05.

is mediated by enrichment of PcG and H3K27me3 at its bivalent promoter and is regulated by *UTX*.

## DISCUSSION

In this study we show that *SOX2* repression in TCam-2 cells is due to the presence of PcG and H3K27me3 at its promoter and that the repression can be reversed by recruitment of *UTX*, a H3K27 demethylase to the promoter. *SOX2* repression is a feature of hPGCs, from which SEM and other GCTs are derived by transformation and upregulation of pluripotency- and proliferation-promoting genes.

PGC specification has been investigated in the greatest detail in the mouse, where it is regulated by a PGC-specific transcriptional network composed of the TFs *Prdm1*, *Prdm14*, and *Tfap2c*, the so-called tripartite network (Magánúsdóttir et al., 2013; Nakaki et al., 2013). Recently, human GC fate determination has been shown to be different to that of the murine GC fate (Irie et al., 2015; Surani, 2015). Thus, hPGC specification is suggested to be initiated

by *SOX17* and its downstream target *PRDM1*, which represses mesendodermal genes, along with extensive epigenome resetting (Tang et al., 2015; Gkoutela et al., 2015). Although the pluripotency factors *NANOG*, *POU5F1*, *PRDM14*, *LIN28A*, *KLF4*, and *TFP2CL1* are expressed in hPGCs as early as 5.5 weeks of gestation (Tang et al., 2015), pluripotency is kept latent and PGCs remain unipotent or lineage restricted during their entire development.

Human fetal GCs express many of the pluripotency markers in common with murine PGCs (De Miguel et al., 2010); however, of the three core pluripotency master regulators *POU5F1*, *NANOG*, and *SOX2*, only the former two are expressed whereas *SOX2* is repressed (Perrett et al., 2008; Tang et al., 2015). Nevertheless, post fertilization, human embryonic blastomeres as well as inner cell mass cells express *SOX2* (Galán et al., 2010), implying that its repression is restricted to germline development. A recent study showed that in H9 hES cells and EC cell lines, ectopic expression of *PRDM1* led to significant reduction in *SOX2* mRNA and protein expression (Lin et al., 2014). The same study also showed that in a ChIP assay, *PRDM1* bound to

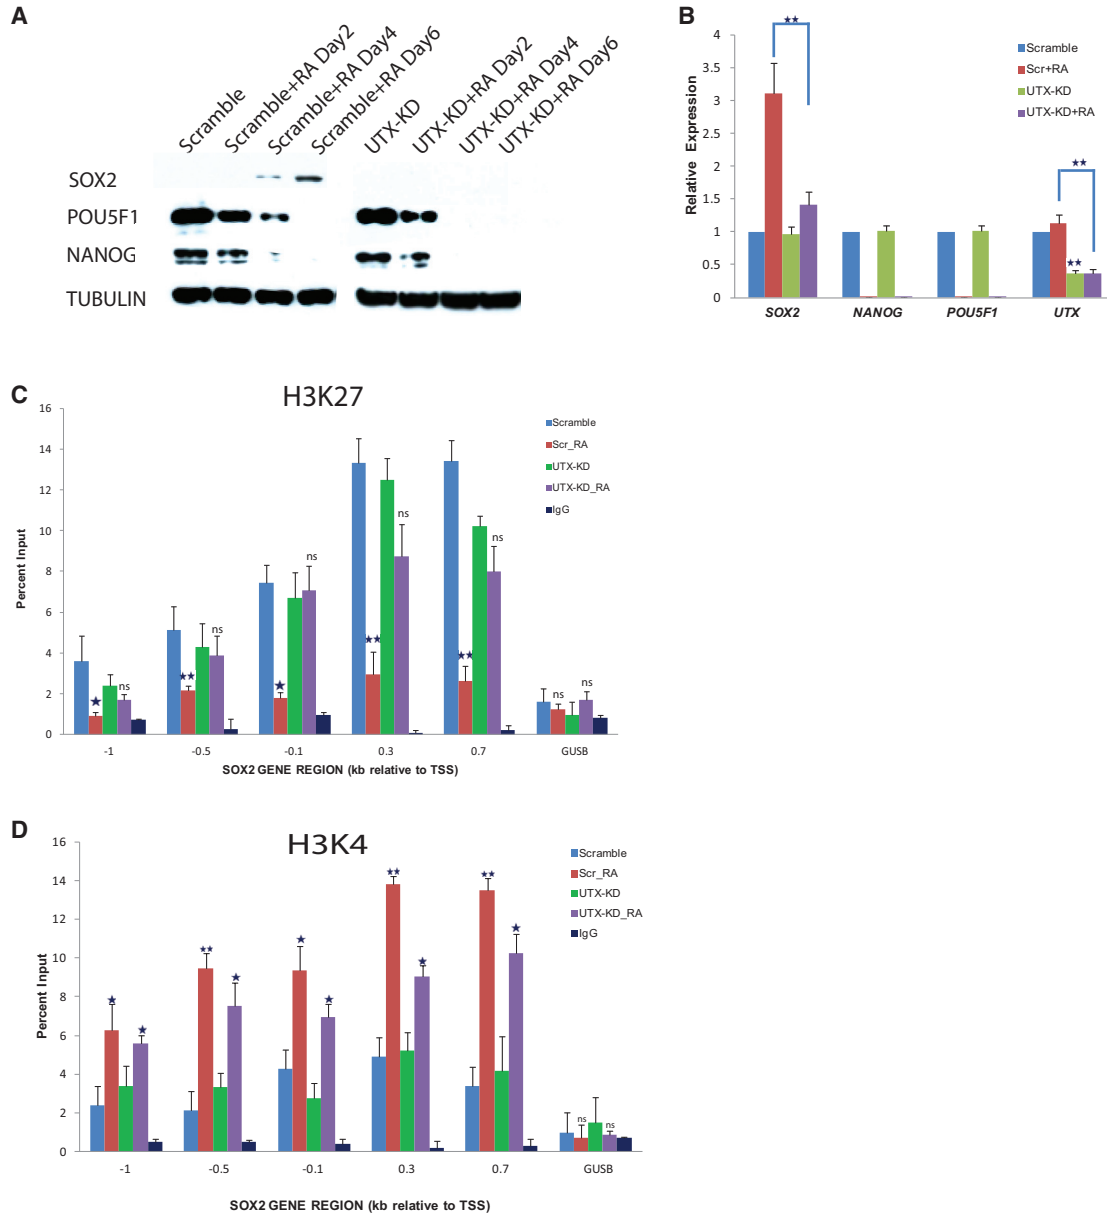

### Figure 6. Epigenetic Modifications of *SOX2* Promoter Leading to RA-Induced Derepression Are Modulated by UTX

(A) Expression of *SOX2*, *POU5F1*, and *NANOG* in the RA-treated UTX-KD cells compared with scramble (scr) cells in a 6-day time-course experiment.

(B) qRT-PCR showing expression level of *SOX2*, *NANOG*, *POU5F1*, and *UTX* in the untreated scr versus UTX-KD cells and treated scr versus UTX-KD cells. Data represent mean  $\pm$  SD of the three independent experiments. \*\* $p < 0.01$  between treated UTX-KD and scr by Student's t test.

(C) ChIP-qPCR showing loss of H3K27me3 enrichment at *SOX2* promoter of RA-treated scr cells compared with untreated cells, whereas the enrichment is unchanged in RA-treated UTX-KD cells. Data represent mean  $\pm$  SD of three independent experiments. Student's t test: ns, not significant; \*\* $p < 0.01$ ; \* $p < 0.05$ .

(D) ChIP-qPCR with H3K4me3 antibody showing enrichment at *SOX2* promoter of RA-treated scr cells compared with untreated scr cells and RA-treated UTX-KD cells compared with untreated KD cells. Data represent mean  $\pm$  SD of three independent experiments. Student's t test: ns, not significant; \*\* $p < 0.01$ ; \* $p < 0.05$ .



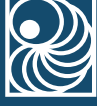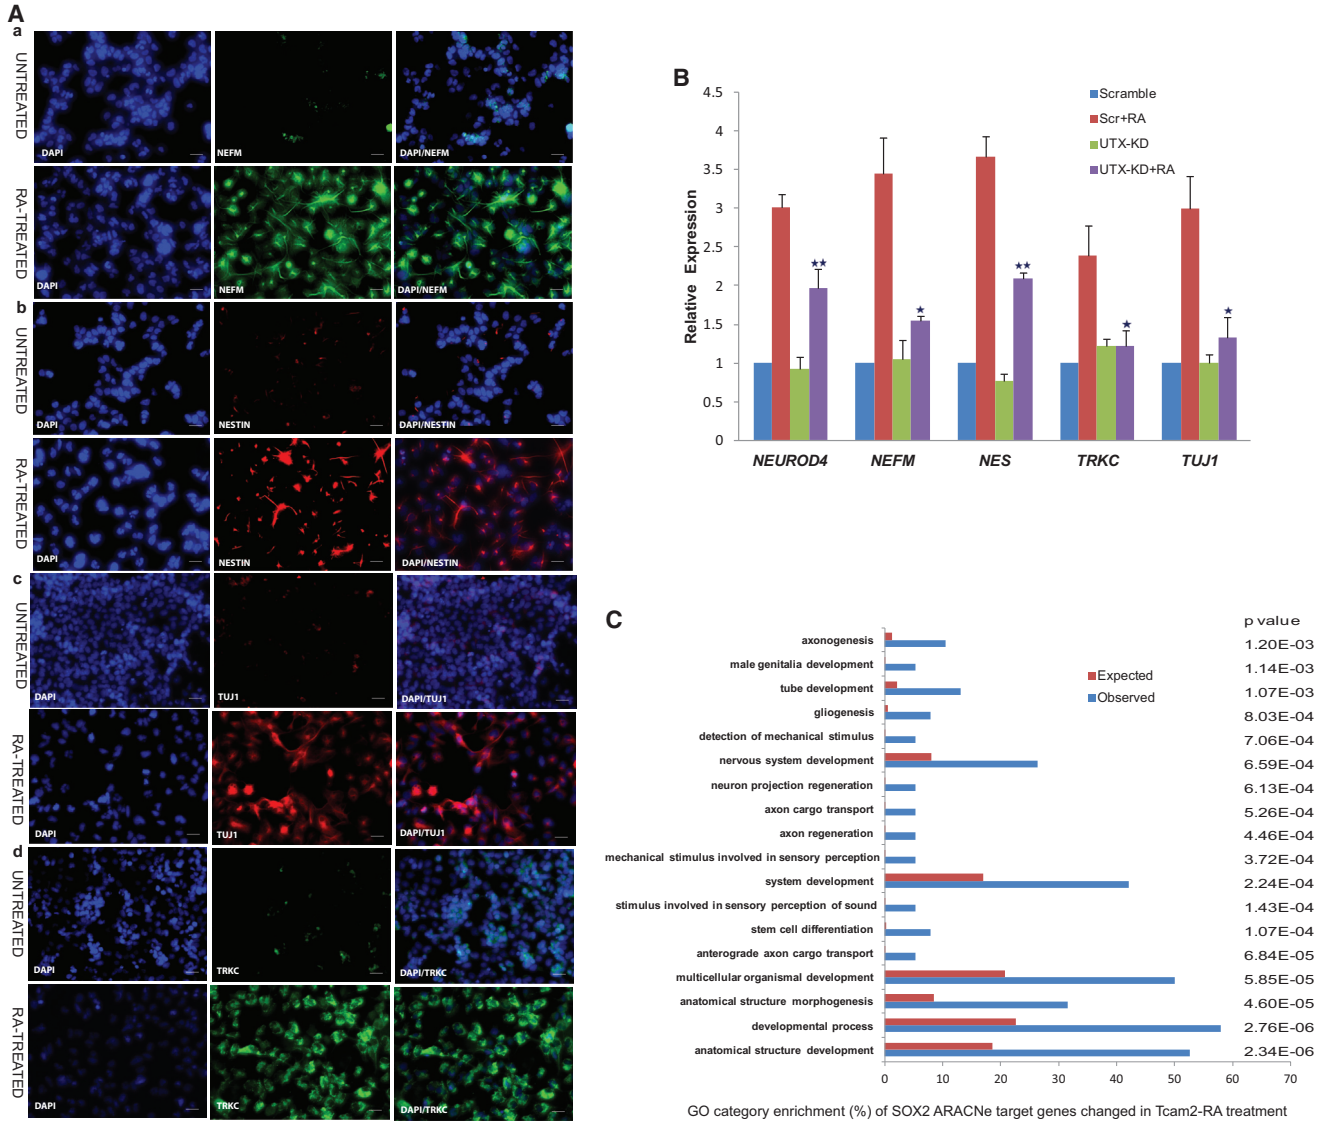

**Figure 7. Neuronal Marker Genes Are Upregulated following SOX2 Derepression in Tcam-2 Cells in Response to Retinoid Signaling**  
 (A) Representative IF showing staining with (a) neurofilament (NEFM), (b) nestin (NES), (c) neuron-specific class III  $\beta$ -tubulin (TUJ1), and (d) neurotrophic tyrosine kinase receptor type 3 (TRKC). Left image, DAPI; middle image, neuronal gene; right image, merged. For each antibody the upper panel represents untreated cells and the lower panel RA-treated cells. Scale bars represent 100  $\mu$ m.  
 (B) Expression of neuronal genes in RA-treated UTX-KD cells compared with RA-treated scramble cells by qRT-PCR. Data represent mean  $\pm$  SD of three independent experiments. \*\*  $p < 0.01$ , \*  $p < 0.05$  by Student's t test.  
 (C) GO categories enriched in ARACNe-predicted SOX2 targets of Tcam-2 cells following RA treatment. Blue bar represents actual enriched number of genes; red bar represents expected enrichment by chance.

a previously identified 12-bp consensus binding site of human *SOX2* gene and that *PRDM1* suppressed the luciferase activity regulated by this genomic region. Based on these results, it was suggested that *PRDM1* regulates *SOX2* during human GC development and acts as a molecular switch to modulate between neural and germline fates (Lin et al., 2014). However, neither the mechanism of *SOX2* repression nor its proposed *PRDM1* regulation has

been demonstrated in hPGCs, GCNIS, or SEM cells, in all of which *SOX2* expression is constitutively repressed. Since Tcam-2 cells are considered to be transformed hPGCs undergoing specification, we investigated the possible control of *SOX2* by *PRDM1* in Tcam-2 and NT2/D1 cells, in both of which *PRDM1* is expressed. Contrary to expectation, our results of *PRDM1* silencing did not confirm its regulation of *SOX2* in either cell type. The discrepancy in results



between the previous study and our study may be related to the differing contexts of cellular biology that they represented. Because the *SOX2* promoter is known to be a target of PcG in human embryonal fibroblast cells (Bracken et al., 2006), we reasoned that its regulation may also be mediated by an epigenetic modification in TCam-2 cells. Thus, after ruling out DNA methylation as the mechanism of repression, we assayed for occupancy of PRC2, PRC1, and H3K27me3 at the promoter and found enrichment, confirming their role in *SOX2* repression. We then sought to alter the enrichment of the repressive epigenetic mark at the promoter through recruitment of *UTX*, an H3K27-specific demethylase, by invoking retinoid signaling in TCam-2 cells, as was done previously in the case of the *HOX* genes in NT2/D1 cells (Lee et al., 2007). RA treatment resulted in a change in the status of *UTX* and the chromatin marks at the *SOX2* promoter, leading to derepression of its transcription and induction of neuronal and other lineage genes. These results thus show that *UTX* targets *SOX2* for transcriptional regulation as in the case of *HOX* genes in human and *Drosophila* cells (Lee et al., 2007; Copur and Müller, 2013). Our data also are in agreement with the idea that *SOX2* repression is an essential component of hPGC specification by preventing neuronal gene expression. Overall, then, hPGC specification appears to be mediated by three key TFs: *SOX17*, which initiates the GC lineage; *PRDM1*, which represses the mesendodermal lineage; and *SOX2*, whose repression prevents neuroectodermal lineage.

*SOX2* is an essential factor in the maintenance of both human and murine pluripotency; however, it is upregulated, along with other pluripotency factors, in murine PGCs but not hPGCs. In this study we have clarified the mechanism of its repression in the hPGC-derived TCam-2 SEM cells and suggest that the same mechanism may be responsible for *SOX2* repression in hPGCs. Although retinoids activated *SOX2* expression in TCam-2 cells, this did not result in restoration of pluripotency as indicated by the differentiated phenotype and downregulation of *POU5F1* and *NANOG* in *SOX2*-expressing TCam-2 cells. Therefore, our results are relevant specifically to *SOX2* biology in human germline, but not necessarily to re-acquisition of pluripotency in EC. The mechanism of the latter is currently unknown, perhaps requiring epigenetic modification at several loci, including *SOX2*. *SOX2* regulation overall is complex and invokes multiple pathways including the action of genes such as *POU5F1*, *NANOG*, *STAT3*, and *SMAD3* (Thomson et al., 2011; Zhang and Cui, 2014) and, as shown previously and in this study, PcG.

Pluripotency comprises a spectrum of states that present in vitro and in vivo (Hackett and Surani, 2014). SEM and EC represent latent and patent versions of hPGC pluripotency; in addition, in vivo GCT pluripotency is distinct from

embryonal pluripotency in being nontransient and associated with self-renewal. The functional pathways operating in SEM and EC in their respective states of pluripotency have not been characterized so far. In this study, by SAM of GEPs and GO biological process analyses of the downregulated and upregulated genes in the two subsets in comparison with normal testes, we show that whereas SEM retained pathways and processes similar to those in PGCs, EC was enriched for pathways that regulate stem cell and development categories; both subsets downregulate meiosis and spermatogenesis categories and upregulate categories associated with proliferation and self-renewal. These data provide an insight into their biology and may represent the starting point for further studies of the unique sensitivity of GCTs to DNA-damaging agents and the regulation of pluripotency and self-renewal in this tumor system.

## EXPERIMENTAL PROCEDURES

### GCT and Cell Line GEPs

We have previously reported the GEPs of 141 GCTs comprising 135 tumors of all histological types and six normal testes obtained by using Affymetrix U133 A plus B microarrays (Korkola et al., 2005, 2006, 2009). A subset of these GEPs comprising 16 SEMs and 41 ECs was used in the current analysis using previously described methods (Kushwaha et al., 2015). GEPs of NT2/D1 and TCam-2 cells were obtained in triplicate using the Affymetrix U133 A plus B microarrays as previously described (Kushwaha et al., 2015). GEP of TCam-2 cells treated with RA for 14 days were obtained from three biological replicates using Affymetrix A plus B microarrays.

### Cell Lines, Cell Culture, and ATRA Treatment

TCam-2 and NT2/D1 cells were cultured and maintained as described previously (Eckert et al., 2008; Houldsworth et al., 2002). For RA treatment, TCam-2 cells were plated at a density of  $2 \times 10^6$  per 10-cm plate and treated on the following day with ATRA (10  $\mu$ M/ml in medium) (Sigma-Aldrich). Cells were collected on days 0, 2, 4, and 6 for downstream experiments. Every 2–3 days, cells were reseeded in the presence of ATRA. The entire time-course experiment was carried out in triplicate with untreated cultures as controls.

### IF Analysis

TCam-2 cells treated with or without ATRA were fixed in 4% paraformaldehyde. Fixed cells were permeabilized in 0.3% Triton X-100 in PBS containing 5% normal goat serum and subjected to immunocytochemical analyses as previously described (Kushwaha et al., 2015). Primary antibodies used for staining were goat anti-*SOX2* (1:100) (catalog #sc17319; Santa Cruz Biotechnology), rabbit anti-*NANOG* (1:100) (#ab21624; Abcam), mouse anti-*POU5F1* (1:200) (#sc5279; Santa Cruz), rabbit anti-*BLIMP1* (#9115; Cell Signaling Technology), mouse anti-*Nestin* (#sc23927; Santa Cruz), rabbit anti-neurofilament (#ab-9034; Abcam), goat anti-*TRKC* (#ab188592; Abcam),

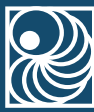

and mouse anti-TUJ1 (#801201; BioLegend). Appropriate fluorescence-labeled secondary antibodies were used for visualization.

### Gene Silencing Using a Transient Assay

For silencing of PRDM1 or UTX genes,  $0.04 \times 10^6$  TCam-2 cells were plated in 24-well plates 1 day prior to transfection. 80 nM PRDM1 (ON-TARGETplus Human PRDM1; Dharmacon) siRNA-SMARTpool or UTX (Dharmacon) siRNA-SMARTpool and control siRNA (ON-TARGETplus Non-targeting Pool; Dharmacon) were used to transfect each well using the DharmaFECT1 Transfection Reagent (Dharmacon). Media were changed after 24 hr of transfection and cells were collected for studies at different time intervals. RNA was isolated using Qiazol lysis reagent (Qiagen) and reverse transcribed using the SuperScript VILO cDNA Synthesis Kit (Life Technologies). mRNA expression was analyzed by qRT-PCR using Taqman probes and primer sets in a 7500 Real-Time PCR system (Applied Biosystems) according to the manufacturer's instructions. *PGK1* mRNA level was used as internal normalization control.

### SOX2 Promoter Methylation Assay by EpiTYPER Analysis

See Supplemental Experimental Procedures and Table S3.

### ChIP and ChIP-qPCR

ChIP assay was performed on TCam-2 cells according to methods previously described by us (Kushwaha et al., 2015). The following antibodies and reagents were used for immunoprecipitation: UTX (Abcam #36938), SUZ12 (Millipore #17661), BMI1 (Abcam #14389), H3K4me3 (pAb) (Active Motif #39159), anti-trimethyl-histone H3 (Lys 27) (Millipore #07-449), and anti-trimethyl-histone H3 (Lys4) (Millipore #07-437). A Dynabeads Protein G immunoprecipitation kit (Life Technologies #10007D) was used. Immunoprecipitated DNA was purified by phenol-chloroform extraction, resuspended in 50 ml of Tris-EDTA, and amplified using oligonucleotides (Table S3). ChIP-qPCR was performed using Power SYBR Green PCR Master Mix (Life Technologies #4367659) on an ABI 7500 cyclo.

### SUPPLEMENTAL INFORMATION

Supplemental Information includes Supplemental Experimental Procedures, two figures, and three tables and can be found with this article online at <http://dx.doi.org/10.1016/j.stemcr.2016.04.002>.

### AUTHOR CONTRIBUTIONS

R.S.K.C. and R.K. developed and designed the study. R.K., N.J., G.M., R.S., and J.E.K. performed experiments. V.T., M.K., and A.C. performed data analysis. M.S., A.C., and G.J.B. participated in manuscript development. R.S.K.C. and R.K. wrote the manuscript.

### ACKNOWLEDGMENTS

Supported by the Byrne Fund and the NCI grant CA008784. We thank the MSKCC Molecular Cytology Core Facility for help with the IF assays and Drs. Sohei Kitazawa and Janet Shipley for

the TCam-2 cells. The help of Adriana Heguy in EpiTYPER analysis of promoter methylation is gratefully acknowledged.

Received: July 14, 2015

Revised: April 1, 2016

Accepted: April 4, 2016

Published: April 28, 2016

### REFERENCES

- Andrews, P.W., Matin, M.M., Bahrami, A.R., Damjanov, I., Gokhale, P., and Draper, J.S. (2005). Embryonic stem (ES) cells and embryonal carcinoma (EC) cells: opposite sides of the same coin. *Biochem. Soc. Trans.* *6*, 1526–1530.
- Bracken, A.P., Dietrich, N., Pasini, D., Hansen, K.H., and Helin, K. (2006). Genome-wide mapping of Polycomb target genes unravels their roles in cell fate transitions. *Genes Dev.* *20*, 1123–1136.
- Chaganti, R.S., and Houldsworth, J. (2000). Genetics and biology of adult human male germ cell tumors. *Cancer Res.* *60*, 1475–1482.
- Copur, Ö., and Müller, J. (2013). The histone H3-K27 demethylase Utx regulates HOX gene expression in Drosophila in a temporally restricted manner. *Development* *140*, 3478–3485.
- De Miguel, M.P., Fuentes-Julián, S., and Alcaina, Y. (2010). Pluripotent stem cells: origin, maintenance and induction. *Stem Cell Rev.* *6*, 633–649.
- Eckert, D., Biermann, K., Nettersheim, D., Gillis, A.J., Steger, K., Jäck, H.M., Müller, A.M., Looijenga, L.H., and Schorle, H. (2008). Expression of BLIMP1/PRMT5 and concurrent histone H2A/H4 arginine 3 dimethylation in fetal germ cells, CIS/IGCNU and germ cell tumors. *BMC Dev. Biol.* *8*, 106.
- Galán, A., Montaner, D., Póo, M.E., Valbuena, D., Ruiz, V., Aguilar, C., Dopazo, J., and Simón, C. (2010). Functional genomics of 5- to 8-cell stage human embryos by blastomere single-cell cDNA analysis. *PLoS One* *5*, e13615.
- Gkountela, S., Zhang, K.X., Shafiq, T., Liao, W.-W., Hargan-Caluo-pina, J., Chen, P.-Y., and Clark, A.T. (2015). DNA methylation dynamics in the human prenatal germline. *Cell* *161*, 1425–1436.
- Gudas, L.J., and Wagner, J.A. (2011). Retinoids regulate stem cell differentiation. *J. Cell Physiol.* *226*, 322–330.
- Hackett, J.A., and Surani, M.A. (2014). Regulatory principles of pluripotency: from the ground state up. *Cell Stem Cell* *15*, 416–430.
- Heaney, J.D., Anderson, E.L., Michelson, M.V., Zechel, J.L., Conrad, P.A., Page, D.C., and Nadeau, J.H. (2012). Germ cell pluripotency, premature differentiation and susceptibility to testicular teratomas in mice. *Development* *139*, 1577–1586.
- Houldsworth, J., Heath, S.C., Bosl, G.J., Studer, L., and Chaganti, R.S. (2002). Expression profiling of lineage differentiation in pluripotent human embryonal carcinoma cells. *Cell Growth Differ.* *13*, 257–264.
- Irie, N., Weinberger, L., Tang, W.W., Kobayashi, T., Viukov, S., Manor, Y.S., Dietmann, S., Hanna, J.H., and Surani, M.A. (2015). SOX17 is a critical specifier of human primordial germ cell fate. *Cell* *160*, 253–268.
- Josephson, R., Ording, C.J., Liu, Y., Shin, S., Lakshmiopathy, U., Toumadje, A., Love, B., Chesnut, J.D., Andrews, P.W., Rao, M.S., and

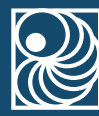

- Auerbach, J.M. (2007). Qualification of embryonal carcinoma 2102ep as a reference for human embryonic stem cell research. *Stem Cells* 25, 437–446.
- Korkola, J.E., Houldsworth, J., Dobrzynski, D., Olshen, A.B., Reuter, V.E., Bosl, G.J., and Chaganti, R.S. (2005). Gene expression-based classification of nonseminomatous male germ cell tumors. *Oncogene* 24, 5101–5107.
- Korkola, J.E., Houldsworth, J., Chadalavada, R.S., Olshen, A.B., Dobrzynski, D., Reuter, V.E., Bosl, G.J., and Chaganti, R.S. (2006). Down-regulation of stem cell genes, including those in a 200-kb gene cluster at 12p13.31 is associated with in vivo differentiation of human male germ cell tumors. *Cancer Res.* 66, 820–827.
- Korkola, J.E., Houldsworth, J., Feldman, D.R., Olshen, A.B., Qin, L.X., Patil, S., Reuter, V.E., Bosl, G.J., and Chaganti, R.S. (2009). Identification and validation of a gene expression signature that predicts outcome in adult men with germ cell tumors. *J. Clin. Oncol.* 27, 5240–5247.
- Kushwaha, R., Jagadish, N., Kustagi, M., Tomishima, M.J., Mendiratta, G., Bansal, M., Kim, H.R., Sumazin, P., Alvarez, M.J., Lefebvre, C., et al. (2015). Interrogation of a context-specific transcription factor network identifies novel regulators of pluripotency. *Stem Cells* 33, 367–377.
- Lee, M.G., Villa, R., Trojer, P., Norman, J., Yan, K.P., Reinberg, D., Di Croce, L., and Shiekhattar, R. (2007). Demethylation of H3K27 regulates polycomb recruitment and H2A ubiquitination. *Science* 318, 447–450.
- Leitch, H.G., Nichols, J., Humphreys, P., Mulas, C., Martello, G., Lee, C., Jones, K., Surani, M.A., and Smith, A. (2013). Rebuilding pluripotency from primordial germ cells. *Stem Cell Rep.* 1, 66–78.
- Lin, I.Y., Chiu, F.L., Yeang, C.H., Chen, H.F., Chuang, C.Y., Yang, S.Y., Hou, P.S., Sintupisut, N., Ho, H.N., Kuo, H.C., et al. (2014). Suppression of the SOX2 neural effector gene by PRDM1 promotes human germ cell fate in embryonic stem cells. *Stem Cell Rep.* 2, 189–204.
- Magnúsdóttir, E., Dietmann, S., Murakami, K., Günesdogan, U., Tang, F., Bao, S., Diamanti, E., Lao, K., Gottgens, B., and Surani, M.A. (2013). A tripartite transcription factor network regulates primordial germ cell specification in mice. *Nat. Cell Biol.* 15, 905–915.
- Mootha, V.K., Lindgren, C.M., Eriksson, K.F., Subramanian, A., Sihag, S., Lehar, J., Puigserver, P., Carlsson, E., Ridderstråle, M., Laurila, E., et al. (2003). PGC-1alpha-responsive genes involved in oxidative phosphorylation are coordinately downregulated in human diabetes. *Nat. Genet.* 34, 267–273.
- Nakaki, F., Hayashi, K., Ohta, H., Kurimoto, K., Yabuta, Y., and Saitou, M. (2013). Induction of mouse germ-cell fate by transcription factors in vitro. *Nature* 501, 222–226.
- Perrett, R.M., Turnpenny, L., Eckert, J.J., O’Shea, M., Sonne, S.B., Cameron, I.T., Wilson, D.I., Rajpert-De Meyts, E., and Hanley, N.A. (2008). The early human germ cell lineage does not express SOX2 during in vivo development or upon in vitro culture. *Biol. Reprod.* 78, 852–858.
- Sperger, J.M., Chen, X., Draper, J.S., Antosiewicz, J.E., Chon, C.H., Jones, S.B., Brooks, J.D., Andrews, P.W., Brown, P.O., and Thomson, J.A. (2003). Gene expression patterns in human embryonic stem cells and human pluripotent germ cell tumors. *Proc. Natl. Acad. Sci. USA* 100, 13350–13355.
- Subramanian, A., Tamayo, P., Mootha, V.K., Mukherjee, S., Ebert, B.L., Gillette, M.A., Paulovich, A., Pomeroy, S.L., Golub, T.R., Lander, E.S., et al. (2005). Gene set enrichment analysis: a knowledge-based approach for interpreting genome-wide expression profiles. *Proc. Natl. Acad. Sci. USA* 102, 15545–15550.
- Surani, M.A. (2015). Human germline: a new frontier. *Stem Cell Rep.* 4, 955–960.
- Tang, W.W., Dietmann, S., Irie, N., Leitch, H.G., Floros, V.I., Bradshaw, C.R., Hackett, J.A., Chinnery, P.F., and Surani, M.A. (2015). A unique gene regulatory network resets the human germline epigenome for development. *Cell* 161, 1453–1467.
- Thomson, M., Liu, S.J., Zou, L.N., Smith, Z., Meissner, A., and Ramathanan, S. (2011). Pluripotency factors in embryonic stem cells regulate differentiation into germ layers. *Cell* 145, 875–889.
- Zhang, S., and Cui, W. (2014). Sox2, a key factor in the regulation of pluripotency and neural differentiation. *World J. Stem Cells* 6, 305–311.

**Stem Cell Reports, Volume 6**

**Supplemental Information**

**Mechanism and Role of SOX2 Repression in Seminoma: Relevance to  
Human Germline Specification**

**Ritu Kushwaha, Nirmala Jagadish, Manjunath Kustagi, Geetu Mendiratta, Marco Seandel, Rekha Soni, James E. Korkola, Venkata Thodima, Andrea Califano, George J. Bosl, and R.S.K. Chaganti**

## **Supplemental figure legends**

Supplemental Fig. 1. Analysis of SOX2 promoter methylation in (A) 8 EC and TCam-2 cell lines along with positive (IVD) and negative (WGA) controls shown as EpiGrams. (B) 5 SEM and 5 EC tumors along with positive (IVD) and negative (WGA) controls shown as EpiGrams. Colored circles indicate level of methylation at each CpG island identified above, red un-methylated, yellow methylated, white not analyzed. Data for 4 primers (SOX\_02, SOX\_03, SOX\_05, SOX\_06) are shown. (Related to figure 4)

Supplemental Fig. 2. Heat maps generated by R programming showing expression of statistically significant lineage genes following TCam2 treated RA cells by GEP analysis. a) Neuronal genes, b) Endodermal genes, c) Mesodermal genes, d) Smooth Muscle genes, e) Epithelial genes. (Related to figure 7).

## **Supplemental tables**

Supplemental Table 1. List of upregulated and downregulated genes in SEM in comparison to normal testis by SAM analysis.

Supplemental Table 2. List of upregulated and downregulated genes in EC in comparison to normal testis by SAM analysis.

Supplemental Table 3. List of Primer Sequences used for the analysis of SOX2 promoter.

## **Supplemental Experimental Procedures**

### *Quantitative DNA methylation analysis*

Tumor specimens: Tumor tissues and clinical data were collected under IRB-approved protocol at Memorial Sloan-Kettering Cancer Center. Seminoma (n=5) and Embryonal carcinoma (n=5) samples were selected based on clinical information, availability of frozen tumor material, and review of corresponding H&E stained sections from paraffin

blocks. Frozen tumor specimens were grossly microdissected in an attempt to minimize normal cell contamination. The genomic DNA was isolated with DNeasy Blood & Tissue kit (Qiagen, catalogue number 69504, USA) from tumor tissues and cell lines (TCAM2 and NT2/D1) along with WGA-negative control and IVD-positive control. The genomic DNA was isolated with DNeasy Blood & Tissue kit (Qiagen, catalogue number 69504, USA), and genomic DNA was given to core facility MSKCC. DNA methylation analysis was carried out using the EpiTyper system from Sequenom (San Diego, CA). The EpiTYPER assay is a tool for the detection and quantitative analysis of DNA methylation using base-specific cleavage of bisulfite-treated DNA and Matrix-Assisted Laser Desorption/Ionization Time-of-Flight Mass Spectrometry (MALDI-TOF MS). Specific PCR primers for bisulfite-converted DNA were designed using the EpiDesigner software ([www.epidesigner.com](http://www.epidesigner.com)), for the entire CpG island of the SOX2 gene. T7-promoter tags are added to the reverse primer to obtain a product that can be *in vitro* transcribed, and a 10-mer tag is added to the forward primer to balance the PCR conditions. One  $\mu\text{g}$  of tumor DNA was subjected to bisulfite treatment using the EZ-96 DNA methylation Kit, which results in the conversion of unmethylated cytosines into uracil, following the manufacturer's instructions (Zymo Research, Orange, CA). PCR reactions were carried out in duplicate, for each of the 2 selected primer pairs, for a total of 4 replicates per sample. For each replicate, 1  $\mu\text{l}$  of bisulfite-treated DNA was used as template for a 5  $\mu\text{l}$  PCR reaction in a 384-well microtiter PCR plate, using 0.2 units of Kapa2G Fast HotStart DNA polymerase (Kapa Biosystems, Cape Town, South Africa), 200  $\mu\text{M}$  dNTPs, and 400 nM of each primer. Cycling conditions were: 94  $^{\circ}\text{C}$  for 15 minutes, 45 cycles of 94  $^{\circ}\text{C}$  for 20 seconds, 56  $^{\circ}\text{C}$  for 30 seconds, 72  $^{\circ}\text{C}$  for 1 minute, and 1 final

cycle at 72 °C for 3 minutes. Unincorporated dNTPs were deactivated using 0.3 U of shrimp alkaline phosphatase (SAP) in 2 µl, at 37 °C for 20 minutes, followed by heat inactivation at 85 °C for 5 minutes. Two µl of SAP-treated reaction were transferred into a fresh 384-well PCR plate, and *in vitro* transcription and T cleavage were carried out in a single 5 µl reaction mix, using the MassCleave kit (Sequenom) containing 1 X T7 polymerase buffer, 3 mM DTT, 0.24 µl of T Cleavage mix, 22 units of T7 RNA and DNA polymerase, and 0.09 mg/ml of RNase A. The reaction was incubated at 37 °C for 3 h. After the addition of a cation exchange resin to remove residual salt from the reactions, 10 nl of EpiTyper reaction product were loaded onto a 384-element SpectroCHIP II array (Sequenom). SpectroCHIPs were analyzed using a Bruker Biflex III matrix-assisted laser desorption/ionization–time of flight (MALDI-TOF) mass spectrometer (SpectroREADER, Sequenom). Results were analyzed using the EpiTyper Analyzer software, and manually inspected for spectra quality and peak quantification.

Sequence analysis of SOX2 promoter regions was performed using EpiTyper Analyzer software Supplemental Table 3). Quantitation of degree of SOX2 methylation using mass spectrometry of amplification product with the Sequenom EpiTYPER assay was performed in 5 Seminoma (Sem) and 5 Embryonal carcinoma (EC) tumor samples along with TCAM2 (Sem cell lines) and NT2/D1 (EC cell lines). Eight primer sets were designed covering entire CpG island of SOX2 gene (1000 bp from upstream and +1000 bp downstream from the transcription site). There was no difference between methylation was observed between Sem and EC tumor or TCAM2 and NT2/D1 cell lines. Standard samples with a known composition (WGA as a negative control and IVD



as a positive control) were used in parallel to acquire standard curves to quantify the level of methylation of each CpG site.

#### *qRT PCR for the neuronal genes*

RNA was isolated from UTX-KD and Scramble cells on day6 of silencing. MRNA was prepared using SuperScript® VILO cDNA Synthesis Kit (Life Technologies Grand Island, NY) and was further assayed with Taqman probes in an applied Biosystems 7500 Real Time PCR system (Applied Biosystems, Grand Island, NY according to the manufacturer's instructions. PGK1 mRNA level was used as internal normalization control. Each experiment represented here was repeated three independent times.

#### *Heat map generation*

The GNU-R platform was used to generate the heat maps displayed in Appendix A through E, specifically the 'gplots' and the 'RColorBrewer' libraries in R. The displays show expression of lineage markers in 3 TCAM2 Retinoic Acid treated samples when compared to 3 untreated control TCAM2 samples. Red color stands for a higher expression value and blue color stands for lower expression. All color values in a row are row-normalized so the expression differences become apparent. The legend at the bottom of the images shows a histogram of counts of expression values in the plot. The cyan jagged line in each column of the plots shows the real expression value along with the average expression (dotted line) of all the spots in the heat map.



Kushwaha\_Sup.Figure 1B.  
(Related to Fig.2)

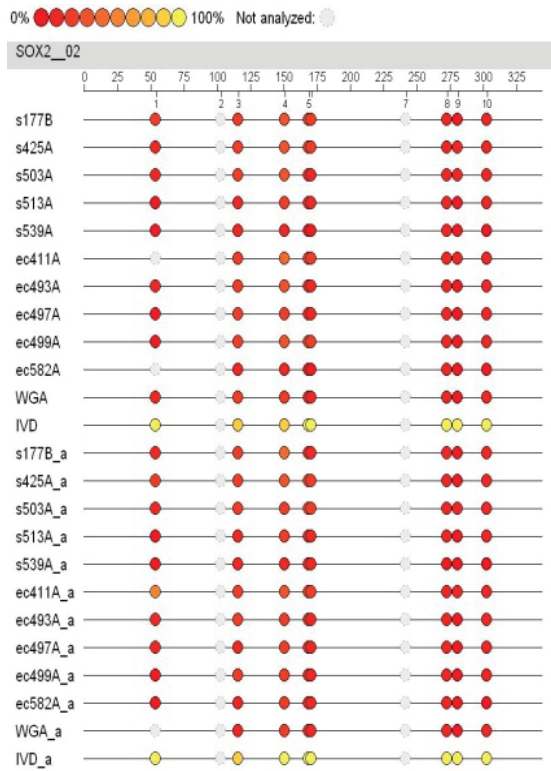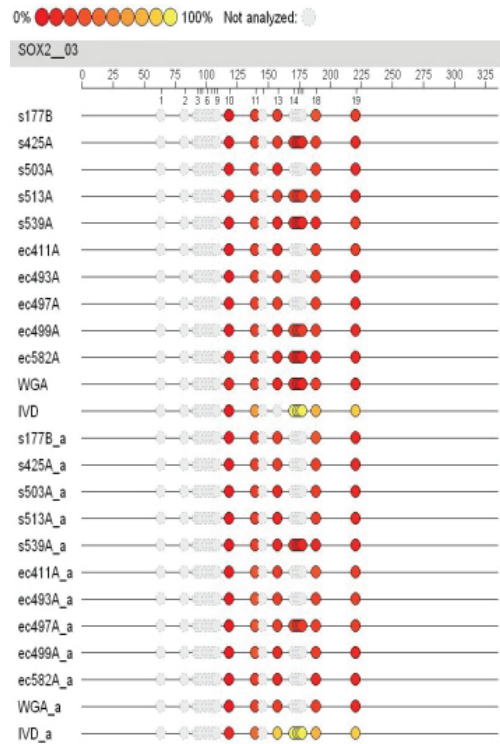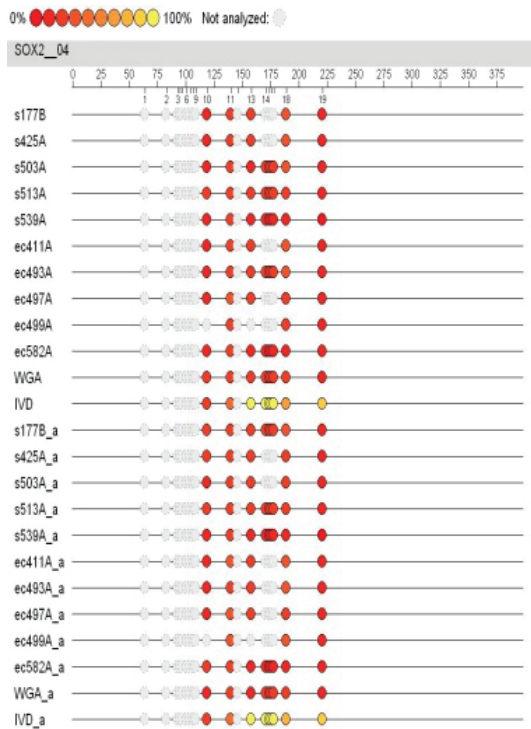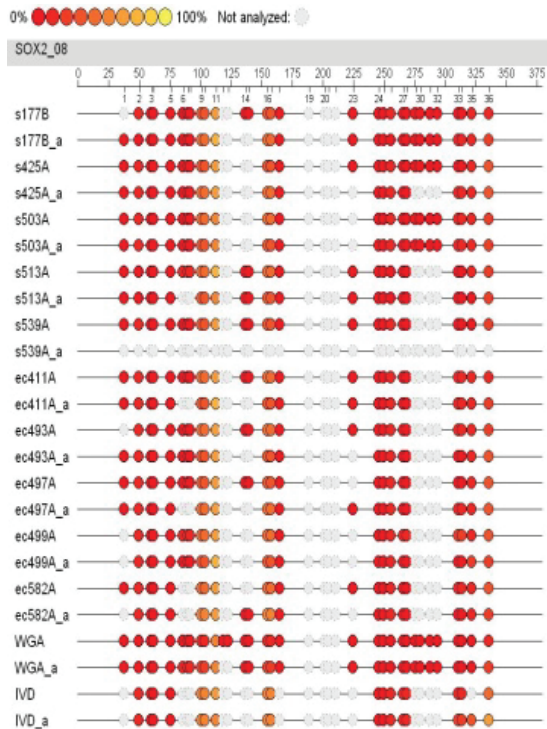

Kushwaha\_Sup.Fig 2.  
(Related to Fig.7)

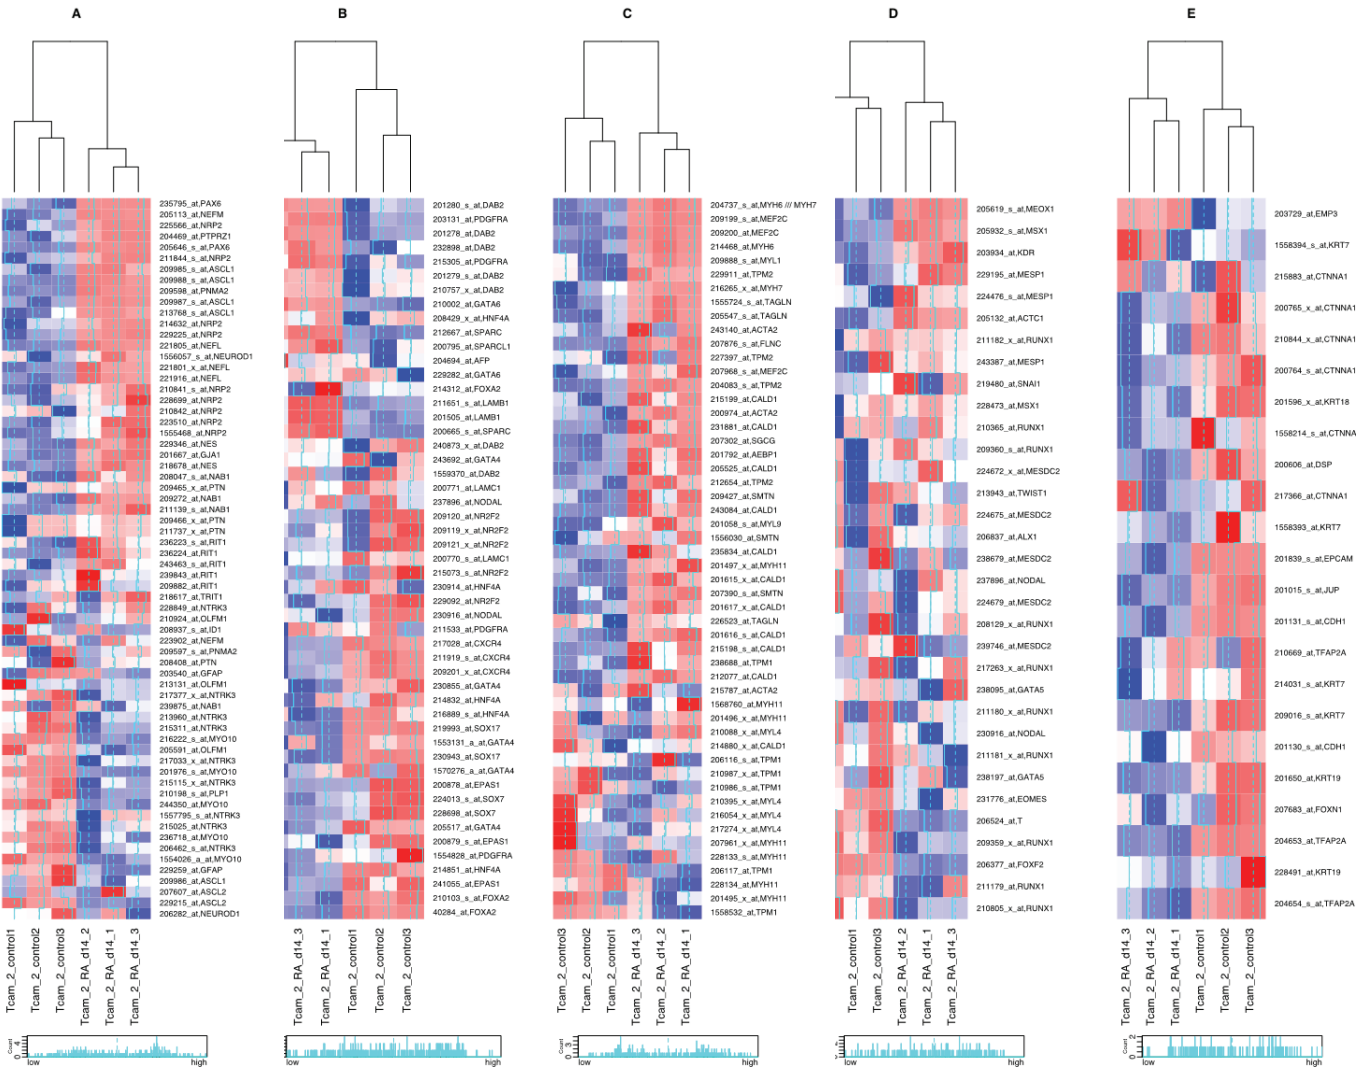

Supplement: mmc5.pdf [file mmc5.pdf]
